# Supplementary material for: Cloning and Functional Identification of SlPG49 in Solanum lycopersicum
Source: MDPI journal article supplement (doi:10.3390/app112311450), 2021-12-03
Supplement: s1 [file s1]

## Supplemental Tables

**Supplemental Table S1.** Primers used in this study.

| Primer Name  | Sequences (5'-3')                          | Annotation                               |
|--------------|--------------------------------------------|------------------------------------------|
| dISIPG49-Fp  | GATAGTACCAATGCAATATC                       | qPCR                                     |
| dISIPG49-Rp  | TCAAGTGTTGAATTCTAAAG                       |                                          |
| CDSSIPG49-Fp | CTTGTGGGATTACATTGAGTTT                     | Cloning                                  |
| CDSSIPG49-Rp | AAAAC TGGCCTCCAGGAAAT                      |                                          |
| Ubi3-Fp      | TCCATCTCGTGCTCCGTCT                        | qPCR                                     |
| Ubi3-Rp      | CTGAACCTTTCCAGTGTCAT                       |                                          |
| yxSIPG49-Fp  | GGACGAGCTGTACAAGATGAATCGTTGGGTTGGGTC       | Subcellular<br>localization of<br>SIPG49 |
| yxSIPG49-Rp  | TAACTCTCTAGACTCACTTATGCGACCACCATCATTT      |                                          |
| yzPFGC-Fp    | GACACGCTCGAGTATAAGAGC                      |                                          |
| yzPFGC-Rp    | GGCGTCTCGCATATCTCAT                        |                                          |
| yhSIPG49-Fp  | AGGATTT CAGAATTCGGATCCGAGACATGCTCGGGGATAGT | Enzyme activity of<br>SIPG49             |
| yhSIPG49-Rp  | ACGACGGCCAGTGCCAAGCTTTTATGCGACCACCATCATTT  |                                          |
| yzpMAL-Fp    | TGCGTACTGCGGTGATCAAC                       |                                          |
| yzpMAL-Rp    | CTGCAAGGCGATTAAGTTGG                       |                                          |

**Supplemental Table S2.** Sequences used in this study.

| Sequence Name | Accession ID |
|---------------|--------------|
| LePG1         | NP_001233795 |
| LePG2         | NP_001234533 |
| LePG3         | AAC28902     |
| LePG4         | AAB09576     |
| LePG5         | NP_001332848 |
| LePG6         | NP_001307818 |
| LePG7         | NP_001234021 |
| BoPG1         | KAF3510442   |
| AtPG1         | NP_187439    |
| AtPG2         | CAA0382367   |
| GhPG          | NP_001314388 |
| PpPG1         | P48979       |
| CmPG          | NP_001284460 |
| BnPG1         | NP_001302875 |
| BnPG2         | NP_001303181 |
| BnPG3         | NP_001302918 |
| BcMF9         | ABN13878     |
| BcMF2         | XP_009109724 |
| BcMF6         | ACP74159     |
| BcMF16        | XP_033148219 |
| BcMF17        | XP_009124086 |
| PpPG2         | BAH56488     |
| MdPG          | P48978       |
| AtPG3         | NP_191310    |
| AtPG4         | NP_850359    |
| AtPG5         | NP_001326987 |
| AtPG6         | NP_179968    |
| CrPG          | XP_006295548 |
| GmPG          | KRH35239     |
| LcPG          | AFW04075     |
| MtPG1         | RHN81761     |
| RcPG          | XP_002513653 |
| BcMF23        | RID66272     |
| MtPG3         | XP_003617998 |
| NtPG          | Q05967       |
| FaPG          | ABE77145     |
| ZmPG          | NP_001105432 |
| SIPG49        | XP_004245522 |
